# Supplementary material for: Selection of Enzymatic Treatments for Upcycling Lentil Hulls into Ingredients Rich in Oligosaccharides and Free Phenolics
Source: MDPI journal article supplement (doi:10.3390/molecules27238458), 2022-12-02
Supplement: s1 [file s1]

**Table S1.** Origin, working pH and temperature range and declared enzymatic activities of seven commercial glycosidases (Novozymes, Bagsværd, Denmark)

| Enzyme                   | Origin                                                   | Working pH | Working Temperature (°C) | Declared activities                                                                                                    |
|--------------------------|----------------------------------------------------------|------------|--------------------------|------------------------------------------------------------------------------------------------------------------------|
| Ultraflo XL              | <i>Humicola insolens</i>                                 | 4.0–6.5    | 45–70/75                 | Endo beta-glucanase (45 BGU /g). Xylanase, cellulase, pentosanase, arabinofuranosidase are declared as side activities |
| Ultraflo Max             | <i>Aspergillus oryzae</i><br><i>Trichoderma reesei</i>   | 4.0–6.5    | 45–70/75                 | $\beta$ -glucanase (endo-1,3(4)-) (700 EGU/g) and Xylanase (endo-1,4-) (250 FXU/g )                                    |
| Ultimase BWL 40          |                                                          |            |                          | Cellulase (1200 CIU/g)                                                                                                 |
| Viscozyme L              | <i>Aspergillus aculeatus</i>                             | 3.5–5.5    | 25–55                    | Endoglucanase (100 FGU/g), pectinase, xylanases, and hemicellulase                                                     |
| Celluclast 1.5L          | <i>Trichoderma reesei</i>                                | 4–6        | 25–55                    | Cellulase activity (700 EGU/g), xylanase (680 U/mL) and endoglucanase (26 U/mL)                                        |
| Pectinase Ultra Tropical | <i>Aspergillus sp.</i>                                   | 3–5        | 10–55                    | Pectinase (5000 PECTU/g), polygalacturonase, pectin lyase, cellulase, xylanase and endo-1,4- $\beta$ -glucanase        |
| Shearzyme Plus 2X        | <i>Aspergillus oryzae</i> /<br><i>Trichoderma reesei</i> | 4–5.5      | 25                       | Cellulase (350 EGU/g), endo-1,4-b-xylanase (250 FXU/g) and a side activity of $\beta$ -glucanase                       |

BGU: fungal  $\beta$ -glucanase units; EGU: endoglucanase units; FXU: fungal endoxylanase units; CIU: cellulase international units; PECTU: pectinase units; FGU: Fungal glucasase units;

**Table S2.** Retention time (Rt), wavelengths of maximum absorption in the visible region ( $\lambda_{\max}$ ), mass spectral data and tentative identification of phenolic compounds in raw and processed lentil hulls

| Peak | Rt (min) | $\lambda_{\max}$ (nm) | Molecular ion [M-H] <sup>-</sup> <i>m/z</i> | MS <sup>2</sup> ( <i>m/z</i> ) | Tentative identification                      |
|------|----------|-----------------------|---------------------------------------------|--------------------------------|-----------------------------------------------|
| 1    | 4.20     | 270                   | 169                                         | 125                            | Gallic acid                                   |
| 2    | 4.65     | 278                   | 897                                         | 593, 289                       | Trimer prodelphinidin                         |
| 3    | 4.99     | 278                   | 593                                         | 425, 289                       | Dimer prodelphinidin (I)                      |
| 4    | 5.30     | 278                   | 881                                         | 577, 525, 289                  | Galloylated dimer (I)                         |
| 5    | 5.53     | 278                   | 451                                         | 289                            | (+)-Catechin O-hexoside                       |
| 6    | 5.80     | 277                   | 577                                         | 289                            | Dimer procyanidin (I)                         |
| 7    | 5.99     | 278                   | 593                                         | 425, 289                       | Dimer prodelphinidin (II)                     |
| 8    | 6.20     | 278                   | 593                                         | 425, 289                       | Dimer prodelphinidin (III)                    |
| 9    | 6.54     | 278                   | 577                                         | 425, 289                       | Dimer procyanidin (II)                        |
| 10   | 6.63     | 278                   | 865                                         | 577, 525, 289                  | Trimer procyanidin                            |
| 11   | 7.47     | 278                   | 289                                         | 245, 137                       | (+)-catechin                                  |
| 12   | 7.96     | 280                   | 881                                         | 577, 525, 289                  | Galloylated dimer (II)                        |
| 13   | 9.26     | 279                   | 289                                         | 245, 137                       | (-)-epicatechin                               |
| 14   | 10.80    | 306                   | 267                                         | 163                            | <i>trans-p</i> -coumaric acid derivative (I)  |
| 15   | 11.45    | 310                   | 267                                         | 163                            | <i>trans-p</i> -coumaric acid derivative (II) |
| 16   | 12.68    | 347                   | 901                                         | 755, 609, 285                  | Kaempferol dirutinoside                       |
| 17   | 12.81    | 346                   | 755                                         | 609, 285                       | Kaempferol rutinoside hexoside                |
| 18   | 13.50    | 350                   | 771                                         | 609, 591, 300                  | Quercetin rutinoside hexoside                 |

Peaks 1, 11 and 13 were identified by comparison of their retention times and UV spectra with commercial standards.

Peaks 2-4, 6-10 and 12 showed a UV spectra similar to procyanidin. These compounds presented a pseudomolecular ion [M-H]<sup>-</sup> at 897, 593, 881, 577 and 865, releasing and MS<sup>2</sup> fragment a *m/z* 289, corresponding to a (epi)-catechin monomer.

Peak 5 showed a pseudomolecular ion  $[M-H]^-$  at 451, releasing an MS2 fragment at  $m/z$  289 ( $[M-H-162]^-$  loss of an hexosyl moiety), corresponding to a catechin monomer. This compound was tentatively identified as (+)-catechin *O*-hexoside. Peak 14 and 15 presented UV spectra similar to *trans-p*-coumaric acid but with different retention times and confirmed with the fragment  $[M-H]^-$  at  $m/z$  163 from *p*-coumaric acid. These compounds are identified as a *trans-p*-coumaric acid derivatives.

Peak 16 and 17 presented a UV spectrum ( $\lambda_{max}$  346) corresponding to the flavanol kaempferol, which showed a molecular ion  $[M-H]^-$  at 901 and 755, and a fragment ion  $[M-H]^-$  at  $m/z$  285, corresponding to kaempferol.

Peak 18 presented a UV spectrum ( $\lambda_{max}$  350) corresponding to the flavanol quercetin, which showed a molecular ion  $[M-H]^-$  at 771, and a fragment ion  $[M-H]^-$  at  $m/z$  300 ( $[M-308-162]^-$  loss of rutinoside and hexoside molecules), corresponding to quercetin.

All these compounds were previously identified in lentils by Aguilera et al., [1], Bautista-Exposito et al., [2] and seed coat of lentils by Dueñas et al., [3].

## References

- [1] Aguilera, Y.; Dueñas, M.; Estrella, I., Hernández, T., Benitez, V., Esteban, R.M.; Martín-Cabrejas, M.A. Evaluation of phenolic profile and antioxidant properties of pardina lentils as affected by industrial dehydration. *Journal of Agricultural and Food Chemistry* **2010**, 58, 10101-10108, doi: 10.1021/jf102222t
- [2] Bautista-Exposito, S.; Peñas, E.; Dueñas, M.; Silván, J.M.; Frias, J.; Martínez-Villaluenga, C. Individual contributions of Savinase and *Lactobacillus plantarum* to lentil functionalization during alkaline pH-controlled fermentation. *Food Chemistry* **2018**, 257, 341-349, doi:10.1016/j.foodchem.2018.03.044.
- [3] Dueñas, M.; Baoshan S., Hernández, T., Estrella, I., Spranger, M.I. Proanthocyanidin composition in the seed coat of lentils (*Lens culinaris* L.). *Journal of Agricultural and Food Chemistry* **2003**, 51, 7999-8004. , doi: 10.1021/jf10303215
